# Supplementary material for: A Cistanches Herba Fraction/β-Sitosterol Causes a Redox-Sensitive Induction of Mitochondrial Uncoupling and Activation of Adenosine Monophosphate-Dependent Protein Kinase/Peroxisome Proliferator-Activated ReceptorγCoactivator-1 in C2C12 Myotubes: A Possible Mechanism Underlying the Weight Reduction Effect
Source: Hindawi journal article supplement (doi:10.1155/2015/142059), 2015-01-01
Supplement: f1 [file 142059.f1.pdf]

## Supplementary materials

Table 1 The effects of kCh, DMTU and CC on the HCF1-induced AMPK/PGC-1 activation in C2C12 myotubes

| (% control)                   | HCF1        | HCF1 + kCh   | HCF1 + DMTU  | HCF1 + CC    |
|-------------------------------|-------------|--------------|--------------|--------------|
| AMPK activation               | 25.8* ± 2.0 | -17.5# ± 4.9 | 2.8# ± 2.0   | - -          |
| PGC-1 nuclear translocation   | 25.3* ± 0.6 | -0.9# ± 8.6  | -27.5# ± 9.1 | -13.7# ± 1.4 |
| Mitochondrial UCP3 expression | 36.9* ± 5.0 | 11.5# ± 5.5  | 2.1# ± 2.4   | -32.3# ± 2.5 |
| Mitochondrial COX expression  | 23.2* ± 2.1 | 6.3# ± 4.3   | -2.2# ± 3.2  | -5.5# ± 1.4  |

Data are expressed as percent control with respect to the unpre-incubated control. Values given are means ± SEM, with n = 4.

\* Significantly different from the unpre-incubated control; # significantly different from the HCF1-pre-incubated control

Table 2 The effects of kCh, DMTU and CC on the BSS-induced AMPK/PGC-1 activation in C2C12 myotubes

| (% control)                   | BSS         | BSS + kCh    | BSS + DMTU   | BSS + CC      |
|-------------------------------|-------------|--------------|--------------|---------------|
| AMPK activation               | 25.4* ± 5.4 | -5.8# ± 11.7 | -15.4# ± 8.9 | - -           |
| PGC-1 nuclear translocation   | 28.1* ± 9.2 | -38.8# ± 3.4 | -2.7# ± 4.5  | -5.1# ± 6.5   |
| Mitochondrial UCP3 expression | 52.6* ± 1.6 | -23.8# ± 2.5 | 2.9# ± 1.4   | -5.5# ± 5.9   |
| Mitochondrial COX expression  | 23.5* ± 1.2 | 1.3# ± 2.1   | -1.4# ± 3.2  | -12.7# ± 11.1 |

Data are expressed as percent control with respect to the unpre-incubated control. Values given are means ± SEM, with n = 4.

\* Significantly different from the unpre-incubated control; # significantly different from the BSS-pre-incubated control

Table 3 The effect of HCF1 and kCh on HFD-induced obese mice

| % ND control       | ND            |               | HFD           |                |               |               |
|--------------------|---------------|---------------|---------------|----------------|---------------|---------------|
|                    | HCF1          | kCh           | Control       | HCF1           | kCh           | HCF1/kCh      |
| Mitochondrial RCR  | 68.8* ± 3.6   | 123.2* ± 11.0 | 100.8 ± 3.8   | 75.8*# ± 3.7   | 99.2 ± 12.8   | 101.1 ± 5.4   |
| Mitochondrial UCP3 | 167.4* ± 15.8 | 99.5 ± 2.9    | 135.5* ± 2.8  | 175.5*# ± 5.1  | 139.8 ± 15.7  | 119.1 ± 24.2  |
| Body weight (AUC)  | 90.6* ± 1.2   | 100.7 ± 2.9   | 110.6* ± 1.6  | 100.0*# ± 1.8  | 115.2* ± 5.6  | 111.8* ± 3.1  |
| Fat index          |               |               |               |                |               |               |
| Subcutaneous fat   | 104.4 ± 28.3  | 106.4 ± 24.8  | 386.9* ± 66.9 | 304.4* ± 35.8  | 310.4* ± 25.8 | 313.4* ± 35.8 |
| Visceral fat index | 99.8 ± 19.5   | 116.4 ± 20.1  | 365.8* ± 63.9 | 267.8*# ± 52.6 | 370.8* ± 27.2 | 361.5* ± 39.1 |

Data are expressed as percent control with respect to the untreated ND control. Values given are means ± SEM, with n = 10.

\*Significantly different from the untreated ND control; #significantly different from the untreated HFD control (p < 0.05)
